# Supplementary material
Source: publisher site journal article supplement (https://www.spandidos-publications.com/3272/downloadSupplementary)

Figure S1. Overview of the molecular mechanism of melatonin in the inhibition of cell cycle, migration and invasion of gall-bladder cancer cells. p, phosphorylated.

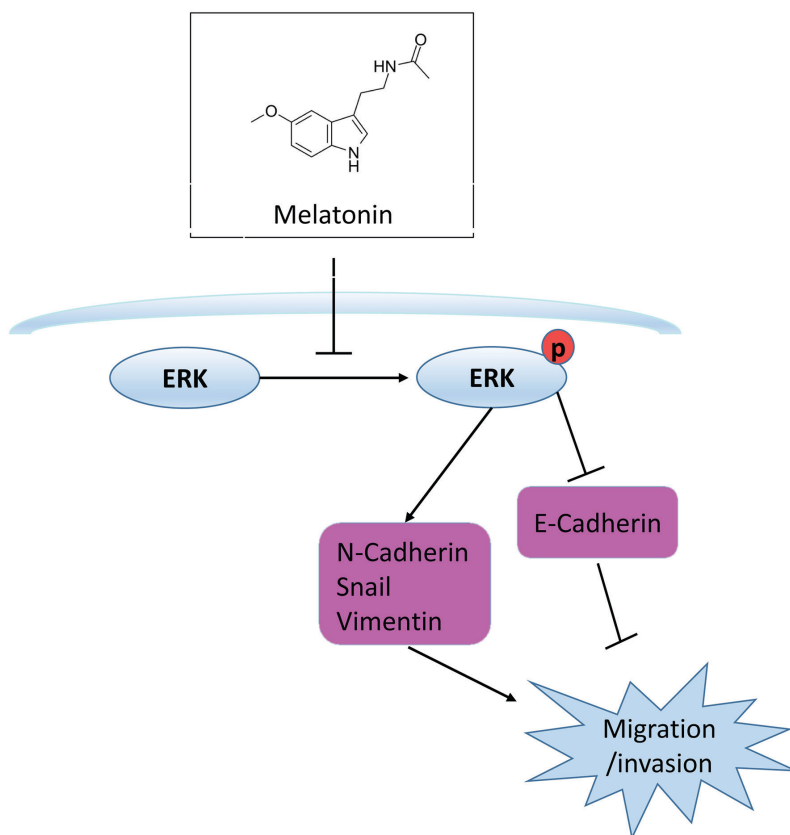

Supplement: Supplementary file 1 [file downloadSupplementary]
